# Supplementary material for: Molecular features and predictive models identify the most lethal subtype and a therapeutic target for osteosarcoma
Source: Front Oncol. 2023 Feb 16;13:1111570. doi: 10.3389/fonc.2023.1111570 (PMC9980341; doi:10.3389/fonc.2023.1111570)
Supplement: Supplementary file 2 [file Table_1.xlsx]

## Sheet: Table S1
Table S1: Clinicopathologic information of TARGET cohort.
PatientID	NMF100 Subtype	NMF400 Subtype	Status	OS.days	EFS status	EFS.days	Metastasis site	Age at Diagnosis in Days	Age	Age group	Disease at diagnosis	Diagnosis	Definitive Surgery	Primary site progression	Histologic response	Percent necrosis at Definitive Surgery	Response
TARGET.40.0A4HLD	S-I	S-I	0	3946	0	3946		7254	19.874	Adult	Non.metastatic (confirmed)	Non.metastatic	Limb sparing	No	Stage 3/4 (91-100 % necrosis)	99	Good
TARGET.40.0A4HMC	S-I	S-I	0	377	0	377		10205	27.9589	Adult	Non.metastatic (confirmed)	Non.metastatic	Amputation	No	Stage 1/2 (0-90 % necrosis)	60	Poor
TARGET.40.0A4I65	S-I	S-I	0	5840	1	1993	Lung only	6520	17.863	Adult	Non.metastatic (Confirmed)	Non.metastatic	Amputation	No	Stage 1/2 (0-90 % necrosis)	80	Poor
TARGET.40.0A4I8S	S-I	S-I	1	788	1	315		5610	15.3699	Juvenile	Non.metastatic (confirmed)	Non.metastatic	Limb sparing	No	Stage 1/2 (0-90 % necrosis)	60	Poor
TARGET.40.0A4I8U	S-I	S-I	0	983	0	983		7328	20.0767	Adult	Non.metastatic (confirmed)	Non.metastatic	Limb sparing	No	Stage 1/2 (0-90 % necrosis)	90	Good
TARGET.40.0A4I9K	S-I	S-I	0	2257	0	2257		8237	22.5671	Adult	Non.metastatic (Confirmed)	Non.metastatic	Limb Sparing	No	Stage 1/2 (0-90 % necrosis)	50	Poor
TARGET.40.PAKFVX	S-I	S-I	0	922	1	361		5407	14.8137	Juvenile	Non.metastatic (confirmed)	Non.metastatic	Limb sparing	Yes		90	Good
TARGET.40.PALECC	S-I	S-I	1	754	1	384		3661	10.0301	Juvenile	Non.metastatic (confirmed)	Non.metastatic		Yes
TARGET.40.PAMJXS	S-I	S-I	1	3862	1	3184		4100	11.2329	Juvenile	Non.metastatic (confirmed)	Non.metastatic		Yes
TARGET.40.PANGPE	S-I	S-I	0	3378	1	833		4794	13.1342	Juvenile	Non.metastatic (confirmed)	Non.metastatic
TARGET.40.PANGRW	S-I	S-I	0	3378	0	3378		6088	16.6795	Juvenile	Non.metastatic (confirmed)	Non.metastatic
TARGET.40.PANZHX	S-I	S-I	0	1323	1	812	Bone and lung	5127	14.0466	Juvenile	Metastatic	Metastatic	Limb sparing			70	Poor
TARGET.40.PAPIJR	S-I	S-I	0	1719	0	1719		4597	12.5945	Juvenile	Non.metastatic (confirmed)	Non.metastatic	Limb sparing		Stage 1/2 (0-90 % necrosis)		Poor
TARGET.40.PARGTM	S-I	S-I	0	2610	0	2610		5925	16.2329	Juvenile	Non.metastatic (confirmed)	Non.metastatic	Limb sparing		Stage 3/4 (91-100 % necrosis)		Good
TARGET.40.PARKAF	S-I	S-I	1	1061	1	56		6085	16.6712	Juvenile	Non.metastatic (confirmed)	Non.metastatic	Limb sparing	Yes	Stage 1/2 (0-90 % necrosis)		Poor
TARGET.40.PASKZZ	S-I	S-I	0	542	0	542		4808	13.1726	Juvenile	Non.metastatic (confirmed)	Non.metastatic	Limb sparing		Stage 3/4 (91-100 % necrosis)		Good
TARGET.40.PASRNE	S-I	S-I	0	1707	1	512		1299	3.5589	Juvenile	Non.metastatic (confirmed)	Non.metastatic
TARGET.40.PATPBS	S-I	S-I	0	1468	0	1468		5513	15.1041	Juvenile	Non.metastatic (confirmed)	Non.metastatic	Limb sparing		Stage 3/4 (91-100 % necrosis)		Good
TARGET.40.PAVCLP	S-I	S-I	0	511	0	511		4062	11.1288	Juvenile	Non.metastatic (confirmed)	Non.metastatic
TARGET.40.PAVDTY	S-I	S-I	0	369	0	369		4898	13.4192	Juvenile	Non.metastatic (confirmed)	Non.metastatic
TARGET.40.0A4I0U	S-II	S-II	0	2216	0	2216		14570	39.9178	Adult	Non.metastatic (confirmed)	Non.metastatic	Limb sparing	No	Stage 1/2 (0-90 % necrosis)	40	Poor
TARGET.40.0A4I0W	S-II	S-II	0	683	0	683		7330	20.0822	Adult	Non.metastatic (confirmed)	Non.metastatic	Limb sparing	No
TARGET.40.0A4I3S	S-II	S-II	0	1844	0	1844		8313	22.7753	Adult	Non.metastatic (confirmed)	Non.metastatic	Limb sparing	No
TARGET.40.0A4I48	S-II	S-II	0	1616	0	1616	Lung only	5854	16.0384	Juvenile	Metastatic	Metastatic	Limb sparing	No	Stage 3/4 (91-100 % necrosis)	99	Good
TARGET.40.0A4I4A	S-II	S-II	0	1583	0	1583		7748	21.2274	Adult	Non.metastatic (confirmed)	Non.metastatic	Limb sparing	No	Stage 1/2 (0-90 % necrosis)	50	Poor
TARGET.40.0A4I4M	S-II	S-II	0	708	0	708		6916	18.9479	Adult	Non.metastatic (confirmed)	Non.metastatic	Limb sparing	No	Stage 3/4 (91-100 % necrosis)	98	Good
TARGET.40.0A4I4O	S-II	S-II	1	627	1	235		11828	32.4055	Adult	Non.metastatic (confirmed)	Non.metastatic	Limb sparing	No	Stage 3/4 (91-100 % necrosis)	95	Good
TARGET.40.0A4I5B	S-II	S-II	0	619	0	619		7615	20.863	Adult	Non.metastatic (confirmed)	Non.metastatic	Limb sparing	No	Stage 3/4 (91-100 % necrosis)	95	Good
TARGET.40.0A4I8O	S-II	S-II	1	909	1	400	Lung only	6070	16.6301	Juvenile	Metastatic	Metastatic	Limb sparing	No	Stage 1/2 (0-90 % necrosis)	90	Good
TARGET.40.NAAEDA	S-II	S-II	1	503	1	359	Lung only	3464	9.49041	Juvenile	Metastatic	Metastatic	Limb sparing	Yes	Stage 1/2 (0-90 % necrosis)	37.5	Poor
TARGET.40.NAAEDH	S-II	S-II	1	1023	1	360	Lung only	6492	17.7863	Adult	Non.metastatic (confirmed)	Non.metastatic	Limb sparing	Yes	Stage 1/2 (0-90 % necrosis)	0	Poor
TARGET.40.NAAEDI	S-II	S-II	1	361	1	274		5663	15.5151	Juvenile	Non.metastatic (confirmed)	Non.metastatic	Limb sparing	Yes	Stage 1/2 (0-90 % necrosis)	26	Poor
TARGET.40.NAASJK	S-II	S-II	1	756	1	756		5540	15.1781	Juvenile	Non.metastatic (confirmed)	Non.metastatic	Amputation	No
TARGET.40.PAKZZK	S-II	S-II	1	1515	1	452		4864	13.326	Juvenile	Non.metastatic (confirmed)	Non.metastatic	Limb sparing	Yes		30	Poor
TARGET.40.PALFYN	S-II	S-II	1	1003	1	651		4841	13.263	Juvenile	Non.metastatic (confirmed)	Non.metastatic		Yes
TARGET.40.PALKGN	S-II	S-II	0	2122	0	2122		6190	16.9589	Juvenile	Non.metastatic (confirmed)	Non.metastatic
TARGET.40.PANMIG	S-II	S-II	1	776	1	513	Lung only	5360	14.6849	Juvenile	Metastatic	Metastatic	Limb sparing			95	Good
TARGET.40.PANVJJ	S-II	S-II	0	3095	0	3095		5044	13.8192	Juvenile	Non.metastatic (confirmed)	Non.metastatic
TARGET.40.PANXSC	S-II	S-II	0	1217	1	366		5545	15.1918	Juvenile	Non.metastatic (confirmed)	Non.metastatic		Yes
TARGET.40.PAPXGT	S-II	S-II	0	2526	0	2526		4172	11.4301	Juvenile	Non.metastatic (confirmed)	Non.metastatic	Limb sparing		Stage 1/2 (0-90 % necrosis)		Poor
TARGET.40.PASEBY	S-II	S-II	0	2049	1	42		4249	11.6411	Juvenile	Non.metastatic (confirmed)	Non.metastatic		Yes
TARGET.40.PASFCV	S-II	S-II	0	2062	0	2062		3849	10.5452	Juvenile	Non.metastatic (confirmed)	Non.metastatic	Amputation		Stage 1/2 (0-90 % necrosis)		Poor
TARGET.40.PASYUK	S-II	S-II	0	1870	0	1870		5931	16.2493	Juvenile	Non.metastatic (confirmed)	Non.metastatic	Limb sparing		Stage 3/4 (91-100 % necrosis)		Good
TARGET.40.PATMIF	S-II	S-II	0	1580	0	1580		4383	12.0082	Juvenile	Non.metastatic (confirmed)	Non.metastatic	Limb sparing		Stage 3/4 (91-100 % necrosis)		Good
TARGET.40.PAUBIT	S-II	S-II	0	1029	0	1029		4513	12.3644	Juvenile	Non.metastatic (confirmed)	Non.metastatic
TARGET.40.PAUTWB	S-II	S-II	0	687	1	598		5064	13.874	Juvenile	Non.metastatic (confirmed)	Non.metastatic
TARGET.40.PAVECB	S-II	S-II	0	476	0	476		3272	8.96438	Juvenile	Non.metastatic (confirmed)	Non.metastatic
TARGET.40.0A4HXS	S-III	S-III	0	2948	0	2948		8470	23.2055	Adult	Non.metastatic (confirmed)	Non.metastatic	Limb sparing	No	Stage 1/2 (0-90 % necrosis)	40	Poor
TARGET.40.0A4HY5	S-III	S-III	1	290	1	218	Lung only	7264	19.9014	Adult	Metastatic	Metastatic	Limb sparing	No	Stage 1/2 (0-90 % necrosis)	50	Poor
TARGET.40.0A4I0Q	S-III	S-III	1	519	1	519	Lung only	7269	19.9151	Adult	Metastatic	Metastatic	Limb sparing	No	Stage 1/2 (0-90 % necrosis)	< 50	Poor
TARGET.40.0A4I4E	S-III	S-III						5978	16.3781	Juvenile	Metastatic	Metastatic
TARGET.40.0A4I6O	S-III	S-III	1	1906	1	484		6738	18.4603	Adult	Non.metastatic (confirmed)	Non.metastatic	Amputation	No
TARGET.40.NAAEDD	S-III	S-III	1	378	1	167		5015	13.7397	Juvenile	Non.metastatic (confirmed)	Non.metastatic	Limb sparing	Yes	Stage 1/2 (0-90 % necrosis)	10	Poor
TARGET.40.NAASJI	S-III	S-III	1	388	1	388		7074	19.3808	Adult	Non.metastatic (confirmed)	Non.metastatic		No
TARGET.40.PAKXLD	S-III	S-III	0	2462	1	578		5245	14.3699	Juvenile	Non.metastatic (confirmed)	Non.metastatic		Yes		30	Poor
TARGET.40.PALHRL	S-III	S-III	0	4374	0	4374	Lung only	6019	16.4904	Juvenile	Metastatic	Metastatic
TARGET.40.PALWWX	S-III	S-III	0	2163	0	2163	Lung only	4464	12.2301	Juvenile	Metastatic	Metastatic	Limb sparing			98	Good
TARGET.40.PAMEKS	S-III	S-III	1	857	1	385	Lung only	3942	10.8	Juvenile	Metastatic	Metastatic	Limb sparing			50	Poor
TARGET.40.PAMHLF	S-III	S-III	0	1913	0	1913		3233	8.85753	Juvenile	Non.metastatic (confirmed)	Non.metastatic
TARGET.40.PAMHYN	S-III	S-III	0	3900	0	3900		3499	9.5863	Juvenile	Non.metastatic (confirmed)	Non.metastatic
TARGET.40.PAMLKS	S-III	S-III	1	180	1	71	Bone and lung	4509	12.3534	Juvenile	Metastatic	Metastatic
TARGET.40.PAMTCM	S-III	S-III	0	3002	0	3002		4938	13.5288	Juvenile	Non.metastatic (confirmed)	Non.metastatic
TARGET.40.PANPUM	S-III	S-III	1	295	1	46	Lung only	5996	16.4274	Juvenile	Metastatic	Metastatic
TARGET.40.PANSEN	S-III	S-III	0	2256	0	2256		5234	14.3397	Juvenile	Non.metastatic (confirmed)	Non.metastatic
TARGET.40.PANZZJ	S-III	S-III	0	1538	0	1538		6855	18.7808	Adult	Non.metastatic (confirmed)	Non.metastatic
TARGET.40.PAPFLB	S-III	S-III						5496	15.0575	Juvenile	Non.metastatic (confirmed)	Non.metastatic
TARGET.40.PAPWWC	S-III	S-III	0	2520	1	1933		3595	9.84932	Juvenile	Non.metastatic (confirmed)	Non.metastatic	Limb sparing	No	Stage 1/2 (0-90 % necrosis)		Poor
TARGET.40.PARJXU	S-III	S-III	1	1631	1	811	Lung only	4624	12.6685	Juvenile	Metastatic (confirmed)	Metastatic	Limb sparing	No	Stage 3/4 (91-100 % necrosis)		Good
TARGET.40.PASEFS	S-III	S-III	0	2112	0	2112		6625	18.1507	Adult	Non.metastatic (confirmed)	Non.metastatic	Limb sparing		Stage 1/2 (0-90 % necrosis)		Poor
TARGET.40.PASUUH	S-III	S-III	0	1625	0	1625		5143	14.0904	Juvenile	Non.metastatic (confirmed)	Non.metastatic	Limb sparing		Stage 3/4 (91-100 % necrosis)		Good
TARGET.40.PATAWV	S-III	S-III	0	1702	0	1702		5667	15.526	Juvenile	Non.metastatic (confirmed)	Non.metastatic	Limb sparing		Stage 3/4 (91-100 % necrosis)		Good
TARGET.40.PATJVI	S-III	S-III	0	1575	0	1575	Lung only	5755	15.7671	Juvenile	Metastatic (confirmed)	Metastatic	Limb sparing		Stage 3/4 (91-100 % necrosis)		Good
TARGET.40.PATKSS	S-III	S-III	1	758	1	63		4889	13.3945	Juvenile	Non.metastatic (confirmed)	Non.metastatic	Limb sparing	Yes	Stage 1/2 (0-90 % necrosis)		Poor
TARGET.40.PAUUML	S-III	S-III	0	672	0	672		2177	5.96438	Juvenile	Non.metastatic (confirmed)	Non.metastatic
TARGET.40.PAUYTT	S-III	S-III	0	579	0	579		6702	18.3616	Adult	Non.metastatic (confirmed)	Non.metastatic
TARGET.40.PAVALD	S-III	S-III	0	551	0	551		5924	16.2301	Juvenile	Non.metastatic (confirmed)	Non.metastatic
TARGET.40.0A4HX8	S-IV	S-IV	0	1750	0	3050		10635	29.137	Adult	Non.metastatic (confirmed)	Non.metastatic	Limb sparing	No	Stage 3/4 (91-100 % necrosis)	100	Good
TARGET.40.0A4I3W	S-IV	S-IV	1	1637	1	428		7023	19.2411	Adult	Non.metastatic (confirmed)	Non.metastatic	Limb sparing	Yes	Stage 1/2 (0-90 % necrosis)	10	Poor
TARGET.40.0A4I42	S-IV	S-IV	1	619	1	351		6268	17.1726	Juvenile	Non.metastatic (confirmed)	Non.metastatic	Limb sparing	No
TARGET.40.PAKUZU	S-IV	S-IV	0	0	0	0		7270	19.9178	Adult	Non.metastatic (confirmed)	Non.metastatic
TARGET.40.PALKDP	S-IV	S-IV	0	3282	0	3282		3388	9.28219	Juvenile	Non.metastatic (confirmed)	Non.metastatic
TARGET.40.PALZGU	S-IV	S-IV	1	2882	1	1452		5603	15.3507	Juvenile	Non.metastatic (confirmed)	Non.metastatic		Yes
TARGET.40.PAMRHD	S-IV	S-IV	1	74	1	39	Bone and lung	3942	10.8	Juvenile	Metastatic	Metastatic
TARGET.40.PAMYYJ	S-IV	S-IV	1	271	1	128	Lung only	6477	17.7452	Adult	Metastatic	Metastatic				67	Poor
TARGET.40.PAPKWD	S-IV	S-IV	1	422	1	192		3478	9.52877	Juvenile	Non.metastatic (confirmed)	Non.metastatic	Limb sparing	No	Stage 1/2 (0-90 % necrosis)		Poor
TARGET.40.PAPNVD	S-IV	S-IV	1	922	1	594		5289	14.4904	Juvenile	Non.metastatic (confirmed)	Non.metastatic	Limb sparing	Yes	Stage 1/2 (0-90 % necrosis)		Poor
TARGET.40.PARBGW	S-IV	S-IV	0	286	0	286	Bone only	4634	12.6959	Juvenile	Metastatic (confirmed)	Metastatic	Limb sparing		Stage 1/2 (0-90 % necrosis)		Poor
TARGET.40.PARDAX	S-IV	S-IV	1	679	1	105	Lung only	3680	10.0822	Juvenile	Metastatic (confirmed)	Metastatic		Yes
TARGET.40.PARFTG	S-IV	S-IV	1	653	1	53		4987	13.663	Juvenile	Non.metastatic (confirmed)	Non.metastatic	Limb sparing	Yes	Stage 1/2 (0-90 % necrosis)		Poor
TARGET.40.PASNZV	S-IV	S-IV	0	1747	0	1747		5947	16.2932	Juvenile	Non.metastatic (confirmed)	Non.metastatic
TARGET.40.PASSLM	S-IV	S-IV	0	1865	1	1865	Lung only	3538	9.69315	Juvenile	Metastatic (confirmed)	Metastatic	Amputation	No	Stage 3/4 (91-100 % necrosis)		Good
TARGET.40.PATEEM	S-IV	S-IV	0	1451	1	961		5875	16.0959	Juvenile	Non.metastatic (confirmed)	Non.metastatic
TARGET.40.PATMPU	S-IV	S-IV	1	1579	1	498		5060	13.863	Juvenile	Non.metastatic (confirmed)	Non.metastatic	Limb sparing	No	Stage 1/2 (0-90 % necrosis)		Poor
TARGET.40.PATMXR	S-IV	S-IV	1	386	1	68	Bone and lung	7631	20.9068	Adult	Metastatic	Metastatic		Yes
TARGET.40.PATUXZ	S-IV	S-IV	1	510	1	510	Bone and lung	6345	17.3836	Juvenile	Metastatic (confirmed)	Metastatic
TARGET.40.PAUTYB	S-IV	S-IV	1	537	1	527		4418	12.1041	Juvenile	Non.metastatic (confirmed)	Non.metastatic
TARGET.40.PAUVUL	S-IV	S-IV	1	347	1	237	Lung only	2027	5.55342	Juvenile	Metastatic (confirmed)	Metastatic
TARGET.40.PAUXPZ	S-IV	S-IV	1	606	1	419	Lung only	4507	12.3479	Juvenile	Metastatic (confirmed)	Metastatic

## Sheet: Table S2
Table S2: Genomic alterations of the 87 samples in TARGET dataset based on WGS, WES, custom targeted whole gene sequencing, RNA-Seq, and SNP array analysis
Subtype	Patients	ATRX	CDKN2A	RB1	MDM2	TP53
S-I	TARGET.40.PAKFVX	FUSION		HOMDEL		HOMDEL
S-I	TARGET.40.PARGTM		HOMDEL			FUSION
S-I	TARGET.40.PARKAF		HOMDEL			FUSION
S-I	TARGET.40.PAVDTY		HOMDEL			FUSION
S-I	TARGET.40.PANGPE			FUSION		FUSION
S-I	TARGET.40.PASRNE			HOMDEL		FUSION
S-I	TARGET.40.0A4HLD			HOMDEL		MISSENSE
S-I	TARGET.40.PAMJXS			HOMDEL		MISSENSE
S-I	TARGET.40.PATPBS			HOMDEL		MISSENSE;FUSION
S-I	TARGET.40.0A4I8U					FUSION
S-I	TARGET.40.PALECC					FUSION
S-I	TARGET.40.PANGRW					FUSION
S-I	TARGET.40.PANZHX					FUSION
S-I	TARGET.40.PAPIJR					FUSION
S-I	TARGET.40.PAVCLP					FUSION
S-I	TARGET.40.0A4HMC					HOMDEL
S-I	TARGET.40.0A4I9K					MISSENSE
S-I	TARGET.40.PASKZZ					TRUNC
S-I	TARGET.40.0A4I65
S-II	TARGET.40.PALFYN	FUSION	HOMDEL			FUSION
S-II	TARGET.40.0A4I3S	TRUNC		FUSION		FUSION
S-II	TARGET.40.PANMIG	TRUNC		TRUNC		HOMDEL
S-II	TARGET.40.0A4I4O		HOMDEL			FUSION
S-II	TARGET.40.PASEBY		HOMDEL			FUSION
S-II	TARGET.40.PATMIF		HOMDEL			FUSION
S-II	TARGET.40.PAUBIT		HOMDEL			FUSION
S-II	TARGET.40.PAUTWB		HOMDEL			FUSION
S-II	TARGET.40.0A4I48			TRUNC		TRUNC
S-II	TARGET.40.PALKGN					FUSION
S-II	TARGET.40.PANXSC					FUSION
S-II	TARGET.40.PAPXGT					FUSION
S-II	TARGET.40.PASFCV					FUSION
S-II	TARGET.40.PASYUK					FUSION
S-II	TARGET.40.0A4I0W					HOMDEL
S-II	TARGET.40.0A4I4M					HOMDEL
S-II	TARGET.40.PANVJJ					HOMDEL
S-II	TARGET.40.PAVECB					HOMDEL
S-II	TARGET.40.PAKZZK					MISSENSE
S-II	TARGET.40.0A4I5B					TRUNC
S-III	TARGET.40.PALWWX	HOMDEL		HOMDEL		FUSION
S-III	TARGET.40.PARJXU	HOMDEL		TRUNC		TRUNC
S-III	TARGET.40.PAUYTT	MISSENSE		HOMDEL		FUSION
S-III	TARGET.40.PASEFS	TRUNC	HOMDEL			TRUNC
S-III	TARGET.40.PAMHYN		HOMDEL			FUSION
S-III	TARGET.40.PATJVI		HOMDEL			FUSION
S-III	TARGET.40.PAPWWC			FUSION		FUSION
S-III	TARGET.40.PAUUML			FUSION		FUSION
S-III	TARGET.40.PANPUM			HOMDEL		FUSION
S-III	TARGET.40.PAPFLB			HOMDEL		FUSION
S-III	TARGET.40.PATAWV			HOMDEL		FUSION
S-III	TARGET.40.PAVALD			HOMDEL		FUSION
S-III	TARGET.40.PAMTCM			HOMDEL		HOMDEL
S-III	TARGET.40.0A4I4E			TRUNC		TRUNC
S-III	TARGET.40.0A4I0Q				AMP
S-III	TARGET.40.0A4HY5					FUSION
S-III	TARGET.40.PALHRL					FUSION
S-III	TARGET.40.PAMEKS					FUSION
S-III	TARGET.40.PAMLKS					FUSION
S-III	TARGET.40.PANZZJ					FUSION
S-III	TARGET.40.PASUUH					FUSION
S-III	TARGET.40.PATKSS					FUSION
S-III	TARGET.40.0A4HXS					HOMDEL
S-III	TARGET.40.PANSEN					HOMDEL
S-III	TARGET.40.0A4I6O					MISSENSE
S-III	TARGET.40.PAKXLD					MISSENSE
S-III	TARGET.40.PAMHLF					MISSENSE
S-IV	TARGET.40.0A4I42	HOMDEL				FUSION
S-IV	TARGET.40.PATEEM	HOMDEL				FUSION
S-IV	TARGET.40.PATMPU	HOMDEL				HOMDEL
S-IV	TARGET.40.PATMXR	MISSENSE		HOMDEL		FUSION
S-IV	TARGET.40.PATUXZ	MISSENSE		HOMDEL		FUSION
S-IV	TARGET.40.PASSLM	TRUNC		MISSENSE		TRUNC
S-IV	TARGET.40.PAMYYJ	TRUNC		TRUNC		FUSION
S-IV	TARGET.40.PARFTG		HOMDEL			HOMDEL
S-IV	TARGET.40.PAPNVD			FUSION		FUSION
S-IV	TARGET.40.0A4HX8			HOMDEL		MISSENSE
S-IV	TARGET.40.PALZGU			HOMDEL		MISSENSE
S-IV	TARGET.40.PAMRHD			MISSENSE		FUSION
S-IV	TARGET.40.PAKUZU			TRUNC		FUSION
S-IV	TARGET.40.PARDAX			TRUNC		MISSENSE
S-IV	TARGET.40.PASNZV			TRUNC		TRUNC
S-IV	TARGET.40.PAPKWD					FUSION
S-IV	TARGET.40.PARBGW					FUSION
S-IV	TARGET.40.PAUTYB					FUSION
S-IV	TARGET.40.PAUVUL					FUSION
S-IV	TARGET.40.PALKDP					HOMDEL
S-IV	TARGET.40.PAUXPZ					HOMDEL

## Sheet: Table S3
Table S3: ImmuneScore, StromaScore and MicroenvironmentScore for TARGET patients
PatientID	subtypes	ImmuneScore_xCell	StromaScore_xCell	MicroenvironmentScore_xCell
TARGET.40.0A4HLD	S-I	0.00360117	0.00628423	0.0098854
TARGET.40.0A4HMC	S-I	0.116383	0.0697354	0.186119
TARGET.40.0A4I65	S-I	0.0280505	0.0937283	0.121779
TARGET.40.0A4I8S	S-I	0.0678963	0.052372	0.120268
TARGET.40.0A4I8U	S-I	0.0707935	0.064451	0.135244
TARGET.40.0A4I9K	S-I	0.0508659	0.00977444	0.0606404
TARGET.40.PAKFVX	S-I	0.0305079	0.0353645	0.0658725
TARGET.40.PALECC	S-I	0.0716856	0.0629483	0.134634
TARGET.40.PAMJXS	S-I	0.0328091	0.0468151	0.0796242
TARGET.40.PANGPE	S-I	0.0383548	0.0720854	0.11044
TARGET.40.PANGRW	S-I	0.0501776	0.0934661	0.143644
TARGET.40.PANZHX	S-I	0.118936	0.0656901	0.184626
TARGET.40.PAPIJR	S-I	0.135869	0.0853121	0.221181
TARGET.40.PARGTM	S-I	0.0507339	0.0271141	0.0778479
TARGET.40.PARKAF	S-I	0.0421647	0.0759931	0.118158
TARGET.40.PASKZZ	S-I	0.0251804	0.07952	0.1047
TARGET.40.PASRNE	S-I	0.0734127	0.0633189	0.136732
TARGET.40.PATPBS	S-I	0.0458249	0.0894713	0.135296
TARGET.40.PAVCLP	S-I	0.0759018	0.0788951	0.154797
TARGET.40.PAVDTY	S-I	0.0654308	0.0218213	0.0872521
TARGET.40.0A4I0U	S-II	0.397233	0.0155724	0.412805
TARGET.40.0A4I0W	S-II	0.0362087	0.131719	0.167928
TARGET.40.0A4I3S	S-II	0.0325985	0.131074	0.163673
TARGET.40.0A4I48	S-II	0.082527	0.132503	0.21503
TARGET.40.0A4I4A	S-II	0.115166	0.137289	0.252455
TARGET.40.0A4I4M	S-II	0.0998986	0.154501	0.2544
TARGET.40.0A4I4O	S-II	0.0293643	0.0291446	0.0585089
TARGET.40.0A4I5B	S-II	0.080947	0.0802007	0.161148
TARGET.40.0A4I8O	S-II	0.0777288	0.134728	0.212457
TARGET.40.NAAEDA	S-II	0.0731549	0.166541	0.239695
TARGET.40.NAAEDH	S-II	0.107115	0.0909784	0.198093
TARGET.40.NAAEDI	S-II	0.117931	0.0423701	0.160301
TARGET.40.NAASJK	S-II	0.0530662	0.055275	0.108341
TARGET.40.PAKZZK	S-II	0.0450384	0.0729757	0.118014
TARGET.40.PALFYN	S-II	0.0709162	0.096668	0.167584
TARGET.40.PALKGN	S-II	0.0753005	0.134373	0.209673
TARGET.40.PANMIG	S-II	0.0178773	0.128437	0.146314
TARGET.40.PANVJJ	S-II	0.0250312	0.107447	0.132478
TARGET.40.PANXSC	S-II	0.092997	0.059431	0.152428
TARGET.40.PAPXGT	S-II	0.0963711	0.0703988	0.16677
TARGET.40.PASEBY	S-II	0.074075	0.0757844	0.149859
TARGET.40.PASFCV	S-II	0.174477	0.104454	0.278931
TARGET.40.PASYUK	S-II	0.256213	0.131723	0.387936
TARGET.40.PATMIF	S-II	0.112807	0.077561	0.190368
TARGET.40.PAUBIT	S-II	0.0482924	0.142637	0.19093
TARGET.40.PAUTWB	S-II	0.0973611	0.122443	0.219805
TARGET.40.PAVECB	S-II	0.0151949	0.11719	0.132385
TARGET.40.0A4HXS	S-III	0.0416917	0.0644585	0.10615
TARGET.40.0A4HY5	S-III	0.0195842	0.00597879	0.025563
TARGET.40.0A4I0Q	S-III	0.0283855	0.0816344	0.11002
TARGET.40.0A4I4E	S-III	0.00017224	0.103083	0.103255
TARGET.40.0A4I6O	S-III	0.00152874	0.0938449	0.0953736
TARGET.40.NAAEDD	S-III	0.00611874	0.00533457	0.0114533
TARGET.40.NAASJI	S-III	0.0207179	0.0934615	0.114179
TARGET.40.PAKXLD	S-III	4.38e-18	0.0542525	0.0542525
TARGET.40.PALHRL	S-III	0.034248	0.00979437	0.0440424
TARGET.40.PALWWX	S-III	0.0596311	0.0124599	0.072091
TARGET.40.PAMEKS	S-III	0.0057054	0.103755	0.109461
TARGET.40.PAMHLF	S-III	0.0204355	0.10573	0.126165
TARGET.40.PAMHYN	S-III	0.0641281	0.0698233	0.133951
TARGET.40.PAMLKS	S-III	0.00568163	0.00616462	0.0118462
TARGET.40.PAMTCM	S-III	0.00235119	0.0538412	0.0561924
TARGET.40.PANPUM	S-III	0.00567148	0.0787459	0.0844174
TARGET.40.PANSEN	S-III	0.0189555	0.0462004	0.0651559
TARGET.40.PANZZJ	S-III	0.0833313	0.0616998	0.145031
TARGET.40.PAPFLB	S-III	0.0655853	0.00395444	0.0695397
TARGET.40.PAPWWC	S-III	0.0221793	0.0394799	0.0616592
TARGET.40.PARJXU	S-III	2.79e-05	0.116196	0.116224
TARGET.40.PASEFS	S-III	0.00507892	0.0088713	0.0139502
TARGET.40.PASUUH	S-III	0.145462	0.00181487	0.147277
TARGET.40.PATAWV	S-III	0.0134728	0.0585803	0.072053
TARGET.40.PATJVI	S-III	0.0512603	0.0255685	0.0768288
TARGET.40.PATKSS	S-III	3.69e-18	0.0382429	0.0382429
TARGET.40.PAUUML	S-III	0.00209294	0.046224	0.048317
TARGET.40.PAUYTT	S-III	0.000303676	0.134303	0.134606
TARGET.40.PAVALD	S-III	0.0030837	0.0515381	0.0546218
TARGET.40.0A4HX8	S-IV	0.0165679	0.100357	0.116925
TARGET.40.0A4I3W	S-IV	0.00147608	0.0984369	0.099913
TARGET.40.0A4I42	S-IV	0.0251765	0.0138577	0.0390342
TARGET.40.PAKUZU	S-IV	0.015167	0.099664	0.114831
TARGET.40.PALKDP	S-IV	0.00422021	0.0798184	0.0840386
TARGET.40.PALZGU	S-IV	0.0291776	0.116288	0.145465
TARGET.40.PAMRHD	S-IV	0.0585848	0.0930552	0.15164
TARGET.40.PAMYYJ	S-IV	0.0454823	0.119068	0.16455
TARGET.40.PAPKWD	S-IV	0.0179812	0.00593919	0.0239204
TARGET.40.PAPNVD	S-IV	0.0070946	0.0344679	0.0415625
TARGET.40.PARBGW	S-IV	0.0532114	0.0789234	0.132135
TARGET.40.PARDAX	S-IV	0.00857582	0.0442785	0.0528543
TARGET.40.PARFTG	S-IV	0.0569908	0.0855844	0.142575
TARGET.40.PASNZV	S-IV	0.0748386	0.0249676	0.0998062
TARGET.40.PASSLM	S-IV	0.00926029	0.0520924	0.0613526
TARGET.40.PATEEM	S-IV	0.0106801	0.155105	0.165785
TARGET.40.PATMPU	S-IV	0.0297613	0.0442204	0.0739818
TARGET.40.PATMXR	S-IV	0.0267176	0.0422202	0.0689378
TARGET.40.PATUXZ	S-IV	0.00526017	0.0252461	0.0305063
TARGET.40.PAUTYB	S-IV	0.0470135	0.0424555	0.089469
TARGET.40.PAUVUL	S-IV	0.00692249	0.0163734	0.0232959
TARGET.40.PAUXPZ	S-IV	0.00787484	0.0557919	0.0636667

## Sheet: Table S4
Table S4: Differentially expressed genes of each type.
	Genes
S-I UP	ACAD8, ACER3, ACP5, ADGRE2, AK5, AKAP6, ANGPTL6, ANKH, ANPEP, APOBR, ATP6AP2, ATP6V0C, ATP6V0D2, ATP6V0E1, ATP6V1A, ATP6V1B2, ATP6V1E1, ATP6V1F, ATP6V1H, BDH1, BIRC3, BTK, CA2, CAB39L, CACNA2D4, CALCR, CBLB, CCDC189, CCR1, CD300C, CD33, CD4, CD58, CD68, CD84, CDCP1, CDKN1A, CKB, CLDN23, CLEC4A, CLIC6, CREG2, CSF1, CSF1R, CST3, CSTB, CTSD, CTSK, CTSZ, CXCL5, CYTH4, DCSTAMP, DGKI, DIRAS2, DMRTA2, D…
S-II UP	ACRBP, ACSL5, ACTA2, ACTG2, ACVRL1, ADA2, ADAM28, ADAP2, ADCY4, ADCY7, ADGRF5, ADGRG1, ADORA3, AFAP1L2, AIF1, AKNA, ALOX5, ALOX5AP, AOAH, APLNR, APOC1, APOE, APOL1, ARHGAP30, ARHGAP5-AS1, ARHGAP9, ARHGDIB, ARHGEF3, ARRB2, ATP8B4, B3GNT2, BIN2, BLNK, BST1, C10orf128, C19orf38, C1orf162, C1QA, C1QB, C1QC, C1S, C2, C3, C3AR1, C5AR1, CA11, CALHM6, CARD10, CARD11, CARMN, CASP1, CAV2, CAVIN2, CCDC152, …
S-III UP	ABCB6, ABTB2, ADAMTS18, ADAT3, AGPAT2, AHRR, AK1, AK4, ALDH1B1, ALKBH2, ALKBH5, ALX1, ANKRD13B, ANKRD50, ANP32B, ANXA1, ARHGAP32, ARHGEF4, ASNA1, AXIN2, B4GALNT4, B9D1, BCL11B, BZW2, C19orf44, C19orf53, C19orf70, C6orf48, CA9, CABYR, CAPS, CBLN4, CBX2, CCDC112, CCDC124, CCDC85B, CD320, CDC34, CDCA4, CENPS-CORT, CEP78, CH25H, CHRDL1, CITED1, CLPP, CLUAP1, CMBL, CMSS1, COIL, COL23A1, COL27A1, COPS3…
S-IV UP	AACS, AADAT, ABCA3, ABCA4, ABCB4, ABHD3, ABLIM1, ADAM10, ADAM22, ADAMTS10, ADAMTS17, ADAMTSL2, ADGRB3, ADGRD1, ADK, ADRA1A, AFAP1L1, AIFM2, AKIRIN1, ALPL, AMBN, ANGPT1, ANKRD45, ANO1, ANO5, ANXA13, AP3M1, APCDD1, AQP11, ARHGAP23, ARHGAP44, ARHGEF17, ARHGEF33, ARL15, ASPSCR1, ASRGL1, ATAD2, ATP1A1, ATP6V0E2, ATP8A1, B4GALT1-AS1, BAMBI, BCAR3, BCL7A, BFSP1, BMP4, BMP8A, BMP8B, BOK, BRI3BP, C14orf13…

## Sheet: Table S5
Table S5: Enriched pathways in each subtype
ID	Description	Type	S-Ⅰ-Average	S-Ⅱ-Average	S-Ⅲ-Average	S-Ⅳ-Average
WP_OSTEOCLAST_SIGNALING	Osteoclast signaling	S-Ⅰ	0.423006	-0.0526489	-0.312336	0.0506054
BIOCARTA_RECK_PATHWAY	RECK pathway	S-Ⅰ	0.267046	0.117409	-0.0940523	-0.266378
WP_OSTEOPONTIN_SIGNALING	Osteopontin signaling	S-Ⅰ	0.257485	0.0648359	-0.180324	-0.0742577
FUKUSHIMA_TNFSF11_TARGETS	TNFSF11 targets	S-Ⅰ	0.238623	0.026198	-0.240996	0.080171
BIOCARTA_DC_PATHWAY	DC pathway	S-Ⅱ	0.245788	0.378084	-0.334688	-0.207594
BIOCARTA_MONOCYTE_PATHWAY	Monocyte pathway	S-Ⅱ	0.208348	0.315874	-0.17698	-0.16976
WP_CYTOKINES_AND_INFLAMMATORY_RESPONSE	Cytokines and inflammatory response	S-Ⅱ	0.210086	0.259367	-0.194289	-0.116139
PID_INTEGRIN_CS_PATHWAY	Integrin family cell surface interactions	S-Ⅱ	0.228875	0.230912	-0.259575	-0.0781771
KEGG_RIBOSOME	Ribosome	S-Ⅲ	-0.109538	-0.220728	0.223301	-0.0311897
REACTOME_MRNA_SPLICING	mRNA splicing	S-Ⅲ	-0.0609225	-0.185663	0.194617	-0.0274262
REACTOME_TRANSLATION	Translation	S-Ⅲ	-0.0307965	-0.224963	0.180149	-0.0357324
REACTOME_CELL_CYCLE	Cell cycle	S-Ⅲ	-0.0416213	-0.16557	0.12396	-0.0119506
REACTOME_CHOLINE_CATABOLISM	Choline catabolism	S-Ⅳ	-0.0488468	-0.0549111	-0.0519799	0.141057
WP_ARACHIDONATE_EPOXYGENASE_EPOXIDE_HYDROLASE	Arachidonate epoxygenase / epoxide hydrolase	S-Ⅳ	-0.0393295	-0.16086	0.0261777	0.137104
KEGG_STEROID_BIOSYNTHESIS	Steroid biosynthesis	S-Ⅳ	-0.0462203	-0.169748	0.0173423	0.129878
REACTOME_CHOLESTEROL_BIOSYNTHESIS	Cholesterol biosynthesis	S-Ⅳ	-0.059372	-0.23443	0.0618048	0.104617

## Sheet: Table S6
Table S6: Expression of genes related to cholesterol metabolism in each subtype
Symbol	S-Ⅰ-Average	S-Ⅱ-Average	S-Ⅲ-Average	S-Ⅳ-Average
HMGCS1	22.0984	19.8967	28.0674	33.0497
HMGCR	12.6792	15.2685	14.828	18.2623
SQLE	28.3905	29.7762	46.6471	92.6398
CYP27A1	11.7121	13.1873	18.1172	8.7852
ACAT1	49.6597	40.8977	59.3011	64.6601
ACAT2	11.0797	8.62141	15.3537	14.8299
ABCA1	8.16362	9.41038	5.29133	9.81407
ABCG1	4.14793	6.09879	2.96287	6.42745
CD36	43.5509	34.019	36.4962	108.9
LDLR	16.7591	15.1801	33.5918	21.3114
NPC2	425.922	308.285	179.977	205.326
NPC1	34.4783	29.093	35.3516	33.5901
SREBF2	20.9207	25.2205	30.668	31.0958
NR1H2	35.4714	34.4183	30.2046	31.394
NR1H3	17.0688	18.3447	15.6582	14.4173

## Sheet: Table S7
Table S7: Data description for EGA cohort
Sample.ID	Age at Diagnosis in Years	Gender	Race	Histologic Type of Primary Tumor (Dominant One)	Percent Tumor Necrosis (Primary Tumor)	Vital Status	Tumor Specimen Source	Specimen Type	Tumor Collection Timing with Respect to Chemotherapy
WGS.12.1	5	Female	Hispanic	Osteoblastic	0.6	Alive	Femur	Primary	Postchemotherapy
WGS.12.11	59	Male	White	Fibroblastic	0.5	Alive	Tibia	Primary	Postchemotherapy
WGS.12.12	36	Male	White	Dedifferentiated	0.8	Alive	Femur	Primary	Postchemotherapy
WGS.12.13	27	Male	Hispanic	Osteoblastic	0.9	Dead	Femur	Primary	Postchemotherapy
WGS.12.17	37	Male	White	Dedifferentiated	0.05	Alive	Femur	Primary	Postchemotherapy
WGS.12.18	27	Male	Hispanic	Osteoblastic	5-10%	Alive	Femur	Primary	Postchemotherapy
WGS.12.25	70	Female	Hispanic	Fibroblastic	0.71	Dead	Scapula	Primary	Postchemotherapy
WGS.12.28	81	Male	White	Extraosseous		Dead	Pelvis	Primary	Prechemotherapy
WGS.12.30	79	Female	Black	Fibroblastic, radiation-associated	0.76	Dead	Humerus	Primary	Postchemotherapy
WGS.12.6	36	Male	White	Extraosseous	0.4	Alive	Soft tissue	Primary	Postchemotherapy
WGS.12.8	27	Male	Hispanic	Osteoblastic, radiation-associated	0.7	Dead	T10 Vertebra	Primary	Postchemotherapy
WGS.12.9	76	Female	White	Osteoblastic, radiation-associated		Dead	Skull	Primary	Postchemotherapy
WGS.15.2	56	Male	White	Surface	0.92	Alive	Femur	Primary	Postchemotherapy
WGS.19.8	55	Female	White	Osteoblastic	0.1	Dead	Femur	Primary	Postchemotherapy
WGS.12.14	13	Female	White	Chondroblastic	0.65	Alive	Femur	Local recurrence	Postchemotherapy
WGS.12.15	47	Male	White	Chondroblastic	0.55	Dead	Scapula	Local recurrence	Postchemotherapy
WGS.12.16	20	Male	White	Chondroblastic		Alive	Skull	Local recurrence	Postchemotherapy
WGS.12.22	20	Male	Hispanic	Dedifferentiated	0	Dead	Femur	Local recurrence	Prechemotherapy
WGS.12.32	78	Male	White	Fibroblastic	0	Alive	Femur	Local recurrence	Postchemotherapy
WGS.12.38	24	Female	Hispanic	Telangiectatic	0.2	Dead	Humerus	Local recurrence	Postchemotherapy
WGS.12.4	69	Female	White	Fibroblastic	0	Dead	Calf muscle	Local recurrence	Postchemotherapy
WGS.12.5	69	Female	White	Fibroblastic	0	Dead	Calf muscle	Local recurrence	Postchemotherapy
WGS.12.7	23	Male	Hispanic	Osteoblastic	0.7	Dead	Humerus	Local recurrence	Postchemotherapy
WGS.15.1	78	Male	White	Fibroblastic	0	Alive	Femur	Local recurrence	Postchemotherapy
WGS.19.9	9	Female	White	Osteoblastic	0.4	Dead	Thigh	Local recurrence	Postchemotherapy
WGS.917168.13.T	9	Female	White	Osteoblastic	0.65	Dead	Humerus	Local recurrence	Postchemotherapy
WGS.12.19	27	Male	White	Osteoblastic	0.99	Dead	Lung	Metastasis	Postchemotherapy
WGS.12.20	48	Male	Black	Extraosseous		Alive	Lung	Metastasis	Postchemotherapy
WGS.12.23	39	Female	Asian	Dedifferentiated	0.6	Dead	Lung	Metastasis	Postchemotherapy
WGS.12.24	18	Female	Black	Fibroblastic	1	Dead	Lung	Metastasis	Postchemotherapy
WGS.12.26	14	Male	White	Chondroblastic	0.98	Dead	Lung	Metastasis	Postchemotherapy
WGS.12.27	42	Male	White	Chondroblastic	0.15	Alive	Lung	Metastasis	Postchemotherapy
WGS.12.29	13	Male	White	Fibroblastic	0.95	Dead	Lung	Metastasis	Postchemotherapy
WGS.12.3	20	Male	White	Giant Cell Rich	0.01	Dead	Lung	Metastasis	Postchemotherapy
WGS.12.31	30	Female	Asian	Telangiectatic	0.35	Dead	Lung	Metastasis	Postchemotherapy
WGS.12.33	11	Female	Black	Chondroblastic	0	Alive	Lung	Metastasis	Postchemotherapy
WGS.12.34	19	Male	Hispanic	high grade NOS	0.01	Dead	Lung	Metastasis	Postchemotherapy
WGS.12.35	15	Male	White	Osteoblastic	0.95	Alive	Lung and atrium	Metastasis	Postchemotherapy
WGS.12.36	55	Female	White	Osteoblastic	0.1	Dead	Lung	Metastasis	Postchemotherapy
WGS.19.1	40	Male	White	Fibroblastic	1	Dead	Lung	Metastasis	Postchemotherapy
WGS.19.10	19	Male	Hispanic	high grade NOS	0.01	Dead	Lung	Metastasis	Postchemotherapy
WGS.19.12	19	Male	Hispanic	high grade NOS	0.95	Alive	Lung	Metastasis	Postchemotherapy
WGS.19.2	17	Male	White	Osteoblastic	0.8	Dead	Lung	Metastasis	Postchemotherapy
WGS.19.3	33	Male	White	Dedifferentiated parosteal	0.75	Alive	Lung	Metastasis	Postchemotherapy
WGS.19.4	52	Female	White	Fibroblastic	0.39	Dead	Lung	Metastasis	Postchemotherapy
WGS.19.5	15	Male	White	Extraosseous		Dead	Lung	Metastasis	Postchemotherapy
WGS.19.6	58	Male	White	Extraosseous		Dead	Lung	Metastasis	Prechemotherapy
WGS.19.7	10	Female	White	Osteoblastic	0.9	Dead	Lung	Metastasis	Postchemotherapy

## Sheet: Table S8
Table S8: Expression levels of cholesterol biosynthesis pathway and related genes in EGA cohort
REACTOME_CHOLESTEROL_BIOSYNTHESIS	Local_recurrence	Lung_metastasis	Primary
CYP51A1	6.25073	5.70364	5.1032
HMGCS1	6.14066	5.34448	5.03567
SQLE	6.06734	4.88095	4.3886
FDFT1	5.85219	5.49963	4.99686
GGPS1	5.66982	5.28142	5.33692
MSMO1	5.30095	3.96609	3.14449
IDI1	5.11194	4.02934	4.46075
HMGCR	5.04374	4.53915	4.22
FDPS	4.93928	4.72414	4.3757
LBR	4.80837	4.3504	4.66003
ARV1	4.25007	3.57217	3.70753
DHCR24	3.44473	4.31216	2.58152
SC5D	3.2755	3.26845	3.15199
ACAT2	3.21254	2.47021	2.13444
NSDHL	2.82454	2.79322	2.43845
PMVK	2.42235	2.05175	2.51866
EBP	1.85839	2.00227	1.37214
DHCR7	1.64338	0.249161	-0.135185
HSD17B7	1.63508	1.25599	1.29232
LSS	0.342626	0.538046	-0.625777
MVD	-0.401293	-0.407939	-0.891485
MVK	-1.37201	-1.33269	-1.71978
TM7SF2	-3.15993	-2.55381	-3.81014
IDI2	-4.82257	-4.94268	-4.50669
ES score	0.264762	0.00229925	-0.32776

## Sheet: Table S9
Table S9: Candidates yielded by drug targets screening
GeneName	OS.HR	OS.Pvalue	Type	SI-AVERAGE	SII-AVERAGE	SIII-AVERAGE	SIV-AVERAGE	Drug target
GRAMD1B	4.19666	0	SIV-Up	12.3756	7.18977	5.36901	25.4097	Yes
CD36	3.87576	0.01	SIV-Up	43.5509	34.019	36.4962	108.9	Yes
π	3.64482	0	SIV-Up	12.1119	8.58887	19.7649	40.3404	Yes
SQLE	3.57522	0	SIV-Up	28.3905	29.7762	46.6471	92.6398	Yes
DKK1	3.50186	0	SIV-Up	14.0035	7.99539	18.2314	73.6045	Yes
LPL	3.3014	0	SIV-Up	16.3301	22.0621	23.8884	48.09	Yes
FOLR1	3.22327	0	SIV-Up	12.3223	12.6586	13.1467	36.0424	Yes
MT1A	3.21064	0	SIV-Up	4.67747	7.05917	11.3738	24.9101	Yes
GALNT14	3.18452	0	SIV-Up	21.3541	11.1202	25.9118	52.7169	Yes
PYGM	2.83918	0	SIV-Up	4.54663	8.39623	8.21568	23.8109	Yes
QPCT	2.79239	0.01	SIV-Up	35.4911	27.74	44.5948	70.7962	Yes
TBXA2R	2.71404	0	SIV-Up	8.22518	7.65469	4.43172	17.6152	Yes
SMOX	2.70221	0.01	SIV-Up	46.8141	32.4688	34.0858	96.9101	Yes
RARRES1	2.69413	0.01	SIV-Up	9.94709	9.92771	4.98228	20.6728	Yes
MCAM	2.68175	0	SIV-Up	79.4818	104.402	58.6871	177.615	Yes
MUC1	2.63974	0.01	SIV-Up	11.9092	9.51899	16.8577	35.0126	Yes
PHOSPHO1	2.61744	0	SIV-Up	117.53	43.1575	78.2634	235.693	Yes
MLC1	2.41426	0.01	SIV-Up	13.2417	5.5444	13.2328	31.2146	Yes
SLC36A2	2.37405	0.01	SIV-Up	11.2364	5.38254	5.28745	19.9242	Yes
TCF7L2	2.21955	0.02	SIV-Up	10.7744	15.2993	11.3224	65.9435	Yes
UST	2.20685	0.02	SIV-Up	13.6397	8.57093	8.22367	21.6333	Yes
HIPK2	2.07195	0.03	SIV-Up	5.6032	5.89728	6.32524	13.6504	Yes
LOX	2.04379	0.04	SIV-Up	117.527	84.4941	100.764	242.214	Yes
MT1H	1.99692	0.04	SIV-Up	8.6167	7.69472	7.79741	19.7098	Yes

## Sheet: Table S10
Table S10: Feature genes identified by PermFIT
var_name	Subtype	PermFIT-SVM	P
CTSK	S-I	0.00232	0.005
ATP6V1B2	S-I	0.00205	0.01
HTRA3	S-I	0.00445	0.034
SIGLEC15	S-I	0.00292	0.008
NFATC1	S-I	0.00456	0.041
TDRD3	S-I	0.00425	0.011
ATP6V0D2	S-I	0.00419	0.01
CLEC4A	S-I	0.0058	0.032
LAT	S-I	0.0052	0.011
IL11	S-I	0.00986	0.037
MLPH	S-I	0.00331	0.005
CCR1	S-I	0.0006	0.035
PNOC	S-I	0.0024	0.031
S100A3	S-I	0.0013	0.023
LIF	S-I	0.00341	0.008
HPGD	S-I	0.00246	0.003
HBA2	S-II	0.02207	0.018
HBB	S-II	0.00176	0.017
HLA.DMA	S-II	0.00123	0.032
S100A9	S-II	0.00298	0.004
LYZ	S-II	0.00135	0.034
LAIR1	S-II	0.00616	0.036
SMOC2	S-II	0.00154	0.043
S100A8	S-II	0.00169	0.004
MIA	S-II	0.00414	0.033
IGHM	S-II	0.00827	0.023
C3	S-II	0.00275	0.016
AGT	S-II	0.00174	0.02
LY86	S-II	0.00108	0.047
TINAGL1	S-II	0.00244	0.043
GGTA1P	S-II	0.00224	0.03
RASL11B	S-II	0.00209	0.006
FMO3	S-II	0.004	0.02
MNDA	S-II	0.00131	0.011
TIMP4	S-II	0.00219	0.044
FPR1	S-II	0.00073	0.007
L1CAM	S-II	0.02461	0.022
FYB1	S-II	0.00015	0.043
GRP	S-II	0.00588	0.016
CXCL11	S-II	0.00045	0.005
EGR2	S-II	0.00139	0.039
ISG15	S-III	0.00748	0.017
FBL	S-III	0.0462	0.006
FXYD1	S-III	0.01778	0.006
TNFRSF18	S-III	0.01031	0.033
UAP1	S-III	0.00345	0.022
ZSWIM7	S-III	0.00841	0.019
POLR1E	S-III	0.00378	0.029
SCARB1	S-III	0.00213	0.022
NPW	S-III	0.00611	0.003
CA9	S-III	0.00251	0.039
GADD45GIP1	S-III	0.00437	0
CTXN1	S-III	0.01284	0.038
EIF4EBP3	S-III	0.00685	0.001
GAL	S-III	0.00495	0.017
ULK2	S-III	0.00582	0.005
ACVR2A	S-III	0.00273	0.002
PLD6	S-III	0.00258	0.013
RGS16	S-III	0.00348	0.032
CLIC3	S-III	0.00454	0.047
CRYGS	S-III	0.0019	0.013
SCT	S-III	0.00155	0.019
CHODL	S-III	0.02071	0.027
RGS4	S-III	0.00554	0.035
CBSL	S-III	0.00411	0.044
XPNPEP2	S-III	0.00235	0.011
KCNJ12	S-III	0.00233	0.014
CDH10	S-III	0.00229	0.018
MYC	S-III	0.0032	0.03
CCDC144CP	S-III	0.00271	0.043
TMEM240	S-III	0.00258	0.014
LIPG	S-III	0.00399	0.04
CTNND2	S-III	0.02487	0.003
TCF7L2	S-IV	0.01793	0.046
APCDD1	S-IV	0.00674	0.01
PCSK5	S-IV	0.03882	0.01
KAZALD1	S-IV	0.00184	0.036
SMOX	S-IV	0.00157	0.027
PTPRZ1	S-IV	0.00087	0.024
MTSS1	S-IV	0.00144	0.023
BMP4	S-IV	0.0081	0.02
FAT3	S-IV	0.00185	0.026
SMPD3	S-IV	0.00049	0.018
OR7E94P	S-IV	0.00131	0.025
RF00017	S-IV	0.01904	0.016
CABP1	S-IV	0.00714	0.025
JAG2	S-IV	0.00223	0.017
MMP20	S-IV	0.00991	0.03
TMTC2	S-IV	0.00451	0.003
TPD52	S-IV	0.00057	0.004
SHROOM3	S-IV	0.00231	0.03
MYO3A	S-IV	0.00273	0.011
FEZ1	S-IV	0.01012	0.001
TBRG1	S-IV	0.00329	0.034
FAM166B	S-IV	0.00282	0.004
ENTPD3	S-IV	0.00791	0.008
CPNE5	S-IV	0.00455	0.013
HIST3H2A	S-IV	0.00096	0.012
PYGM	S-IV	0.0014	0.046
SP6	S-IV	0.00119	0.003
SLC13A5	S-IV	0.01738	0.002
COCH	S-IV	0.00419	0.021
INTU	S-IV	0.01202	0.002
ARHGAP44	S-IV	0.00121	0.032
MTND4LP30	S-IV	0.00334	0.008
IQCF3	S-IV	0.00154	0
FAM241A	S-IV	0.00122	0.025
TSPAN12	S-IV	0.00064	0.034
ADAM32	S-IV	0.00141	0.016
KLHL13	S-IV	0.01492	0.005
CKMT2	S-IV	0.00309	0.003
RN7SL18P	S-IV	0.00661	0.011
RPS6KA6	S-IV	0.00327	0.007
CCKAR	S-IV	0.00619	0.01
RTN1	S-IV	0.00912	0.026
NSG1	S-IV	0.00878	0.005
PLAC8	S-IV	0.00178	0.039
PRTG	S-IV	0.00795	0.012
ILDR2	S-IV	0.00636	0.026
ST6GALNAC2	S-IV	0.00173	0.011
ADAMTS17	S-IV	0.00157	0.008
GTF2IP7	S-IV	0.00956	0.007
TMPRSS9	S-IV	0.00418	0.022
PANX3	S-IV	0.00312	0.005
DNAH10	S-IV	0.00104	0.041
MIR1255B2	S-IV	0.00394	0.022
SLC38A11	S-IV	0.00046	0.033
SLC4A8	S-IV	0.00176	0.017
C12orf50	S-IV	0.00164	0.018
CDC14A	S-IV	0.00229	0.039
RN7SL25P	S-IV	0.00904	0.022
ACSM2A	S-IV	0.00165	0.036
RN7SL674P	S-IV	0.00157	0.013
SLC8A3	S-IV	0.00397	0.019
KLK1	S-IV	0.00382	0.047
CDH8	S-IV	0.00099	0.031
ZXDA	S-IV	0.00252	0.045
TNR	S-IV	0.00999	0.007
CTCFL	S-IV	0.00485	0.048
SPP2	S-IV	0.00052	0.047
HMSD	S-IV	0.00987	0.01
ANKRD36BP2	S-IV	0.00044	0.003

[truncated: 5 more sheets: Table S11, Table S12, Table S13, Table S14, Table S15]
